# Supplementary material
Source: MDPI journal article supplement (https://www.mdpi.com/2304-6740/7/1/11)

# checkCIF/PLATON report

Structure factors have been supplied for datablock(s) ISN106\_123K

THIS REPORT IS FOR GUIDANCE ONLY. IF USED AS PART OF A REVIEW PROCEDURE FOR PUBLICATION, IT SHOULD NOT REPLACE THE EXPERTISE OF AN EXPERIENCED CRYSTALLOGRAPHIC REFEREE.

No syntax errors found.      CIF dictionary      Interpreting this report

## Datablock: ISN106\_123K

---

|                 |                           |                                 |
|-----------------|---------------------------|---------------------------------|
| Bond precision: | C-C = 0.0045 A            | Wavelength=1.54178              |
| Cell:           | a=13.8102(4)              | b=18.4985(6)      c=18.0974(6)  |
|                 | alpha=90                  | beta=107.7455(16)      gamma=90 |
| Temperature:    | 123 K                     |                                 |
|                 | Calculated                | Reported                        |
| Volume          | 4403.3(2)                 | 4403.3(2)                       |
| Space group     | P 21/c                    | P 21/c                          |
| Hall group      | -P 2ybc                   | -P 2yc                          |
| Moiety formula  | C46 H43 Cu N O P2 S, F6 P | C46 H43 Cu1 F6 N1 O1 P3 S1      |
| Sum formula     | C46 H43 Cu F6 N O P3 S    | C46 H43 Cu1 F6 N1 O1 P3 S1      |
| Mr              | 928.33                    | 928.37                          |
| Dx,g cm-3       | 1.400                     | 1.400                           |
| Z               | 4                         | 4                               |
| Mu (mm-1)       | 2.699                     | 2.699                           |
| F000            | 1912.0                    | 1912.0                          |
| F000'           | 1914.20                   |                                 |
| h,k,lmax        | 16,22,22                  | 16,22,21                        |
| Nref            | 8404                      | 7939                            |
| Tmin,Tmax       | 0.806,0.874               | 0.760,0.870                     |
| Tmin'           | 0.806                     |                                 |

Correction method= # Reported T Limits: Tmin=0.760 Tmax=0.870  
AbsCorr = MULTI-SCAN

Data completeness= 0.945      Theta(max)= 70.321

R(reflections)= 0.0530( 6739)      wR2(reflections)= 0.1388( 7893)

S = 0.991      Npar= 532

---

The following ALERTS were generated. Each ALERT has the format  
**test-name\_ALERT\_alert-type\_alert-level.**  
Click on the hyperlinks for more details of the test.

---

### Alert level B

PLAT910\_ALERT\_3\_B Missing # of FCF Reflection(s) Below Theta(Min).

36 Note

---

### Alert level C

PLAT029\_ALERT\_3\_C \_diffrn\_measured\_fraction\_theta\_full value Low . 0.978 Why?  
PLAT094\_ALERT\_2\_C Ratio of Maximum / Minimum Residual Density .... 2.08 Report  
PLAT127\_ALERT\_1\_C Implicit Hall Symbol Inconsistent with Explicit -P 2yc  
PLAT220\_ALERT\_2\_C Non-Solvent Resd 1 C Ueq(max)/Ueq(min) Range 3.3 Ratio  
PLAT241\_ALERT\_2\_C High 'MainMol' Ueq as Compared to Neighbors of C3 Check  
PLAT250\_ALERT\_2\_C Large U3/U1 Ratio for Average U(i,j) Tensor .... 2.1 Note  
PLAT601\_ALERT\_2\_C Structure Contains Solvent Accessible VOIDS of . 38 Ang\*\*3  
PLAT911\_ALERT\_3\_C Missing FCF Refl Between Thmin & STh/L= 0.600 159 Report

---

### Alert level G

PLAT042\_ALERT\_1\_G Calc. and Reported MoietyFormula Strings Differ Please Check  
PLAT231\_ALERT\_4\_G Hirshfeld Test (Solvent) P3 --F5 . 5.1 s.u.  
PLAT232\_ALERT\_2\_G Hirshfeld Test Diff (M-X) Cul --P2 . 5.5 s.u.  
PLAT244\_ALERT\_4\_G Low 'Solvent' Ueq as Compared to Neighbors of P3 Check  
PLAT790\_ALERT\_4\_G Centre of Gravity not Within Unit Cell: Resd. # 2 Note  
F6 P  
PLAT808\_ALERT\_5\_G No Parseable SHELXL Style Weighting Scheme Found Please Check  
PLAT882\_ALERT\_1\_G No Datum for \_diffrn\_reflms\_av\_unetI/netI ..... Please Do !  
PLAT912\_ALERT\_4\_G Missing # of FCF Reflections Above STh/L= 0.600 310 Note  
PLAT913\_ALERT\_3\_G Missing # of Very Strong Reflections in FCF .... 1 Note  
PLAT929\_ALERT\_5\_G No Weight Pars,Obs and Calc R1,wR2,S not Checked ! Info  
PLAT960\_ALERT\_3\_G Number of Intensities with I < - 2\*sig(I) ... 8 Check

---

0 **ALERT level A** = Most likely a serious problem - resolve or explain  
1 **ALERT level B** = A potentially serious problem, consider carefully  
8 **ALERT level C** = Check. Ensure it is not caused by an omission or oversight  
11 **ALERT level G** = General information/check it is not something unexpected

3 ALERT type 1 CIF construction/syntax error, inconsistent or missing data  
6 ALERT type 2 Indicator that the structure model may be wrong or deficient  
5 ALERT type 3 Indicator that the structure quality may be low  
4 ALERT type 4 Improvement, methodology, query or suggestion  
2 ALERT type 5 Informative message, check

---

## Validation response form

Please find below a validation response form (VRF) that can be filled in and pasted into your CIF.

```
# start Validation Reply Form
_vrf_PLAT029_ISN106_123K
;
PROBLEM: _diffrn_measured_fraction_theta_full value Low . 0.978 Why?
RESPONSE: ...
;
_vrf_PLAT094_ISN106_123K
;
PROBLEM: Ratio of Maximum / Minimum Residual Density .... 2.08 Report
RESPONSE: ...
;
_vrf_PLAT127_ISN106_123K
;
PROBLEM: Implicit Hall Symbol Inconsistent with Explicit -P 2yc
```

```

RESPONSE: ...
;
_vrf_PLAT220_ISN106_123K
;
PROBLEM: Non-Solvent Resd 1 C Ueq(max)/Ueq(min) Range 3.3 Ratio
RESPONSE: ...
;
_vrf_PLAT241_ISN106_123K
;
PROBLEM: High 'MainMol' Ueq as Compared to Neighbors of C3 Check
RESPONSE: ...
;
_vrf_PLAT250_ISN106_123K
;
PROBLEM: Large U3/U1 Ratio for Average U(i,j) Tensor .... 2.1 Note
RESPONSE: ...
;
_vrf_PLAT601_ISN106_123K
;
PROBLEM: Structure Contains Solvent Accessible VOIDS of . 38 Ang**3
RESPONSE: ...
;
_vrf_PLAT911_ISN106_123K
;
PROBLEM: Missing FCF Refl Between Thmin & STh/L= 0.600 159 Report
RESPONSE: ...
;
# end Validation Reply Form

```

---

It is advisable to attempt to resolve as many as possible of the alerts in all categories. Often the minor alerts point to easily fixed oversights, errors and omissions in your CIF or refinement strategy, so attention to these fine details can be worthwhile. In order to resolve some of the more serious problems it may be necessary to carry out additional measurements or structure refinements. However, the purpose of your study may justify the reported deviations and the more serious of these should normally be commented upon in the discussion or experimental section of a paper or in the "special\_details" fields of the CIF. checkCIF was carefully designed to identify outliers and unusual parameters, but every test has its limitations and alerts that are not important in a particular case may appear. Conversely, the absence of alerts does not guarantee there are no aspects of the results needing attention. It is up to the individual to critically assess their own results and, if necessary, seek expert advice.

### Publication of your CIF in IUCr journals

A basic structural check has been run on your CIF. These basic checks will be run on all CIFs submitted for publication in IUCr journals (*Acta Crystallographica*, *Journal of Applied Crystallography*, *Journal of Synchrotron Radiation*); however, if you intend to submit to *Acta Crystallographica Section C* or *E* or *IUCrData*, you should make sure that full publication checks are run on the final version of your CIF prior to submission.

### Publication of your CIF in other journals

Please refer to the *Notes for Authors* of the relevant journal for any special instructions relating to CIF submission.

PLATON version of 13/12/2017; check.def file version of 12/12/2017

Datablock ISN106\_123K - ellipsoid plot

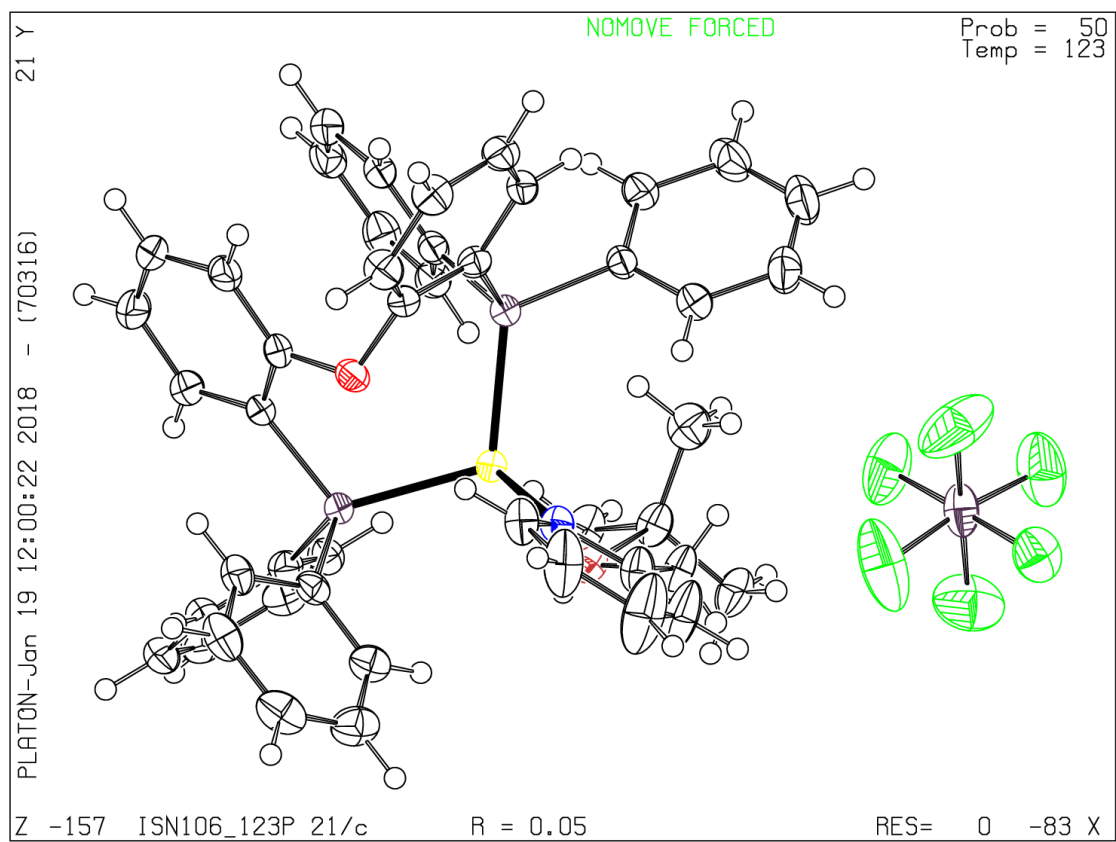

Supplement: s1 [file s1]
