# Supplementary material
Source: MDPI journal article supplement (https://www.mdpi.com/2304-6740/7/1/11)
Supplement: s1 [file s1]

## Supplementary Materials: Softening the Donor-Set: From [Cu(P<sup>^</sup>P)(N<sup>^</sup>N)][PF<sub>6</sub>] to [Cu(P<sup>^</sup>P)(N<sup>^</sup>S)][PF<sub>6</sub>]

Isaak Nohara, Alessandro Prescimone, Catherine E. Housecroft and Edwin C. Constable \*

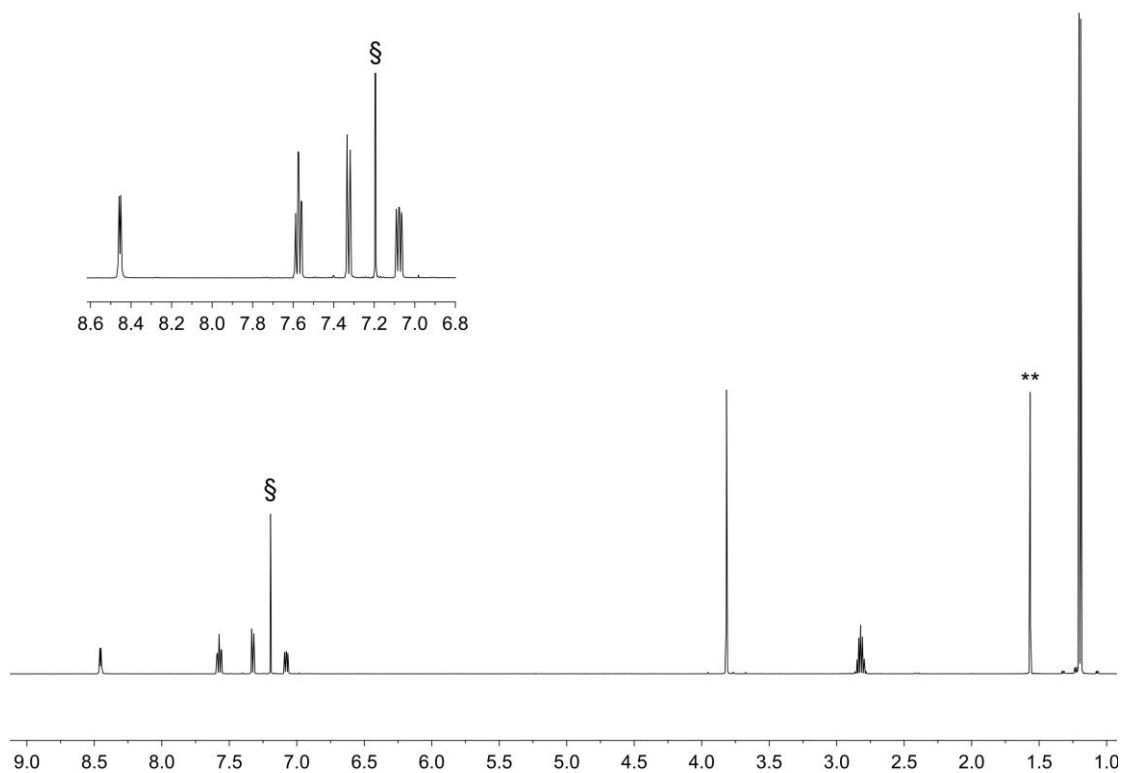

Figure S1. <sup>1</sup>H NMR spectrum of *i*PrSPy (500 MHz, CDCl<sub>3</sub>, 298 K). Inset: expansion of the aromatic region. § = residual CHCl<sub>3</sub>; \*\* = H<sub>2</sub>O.

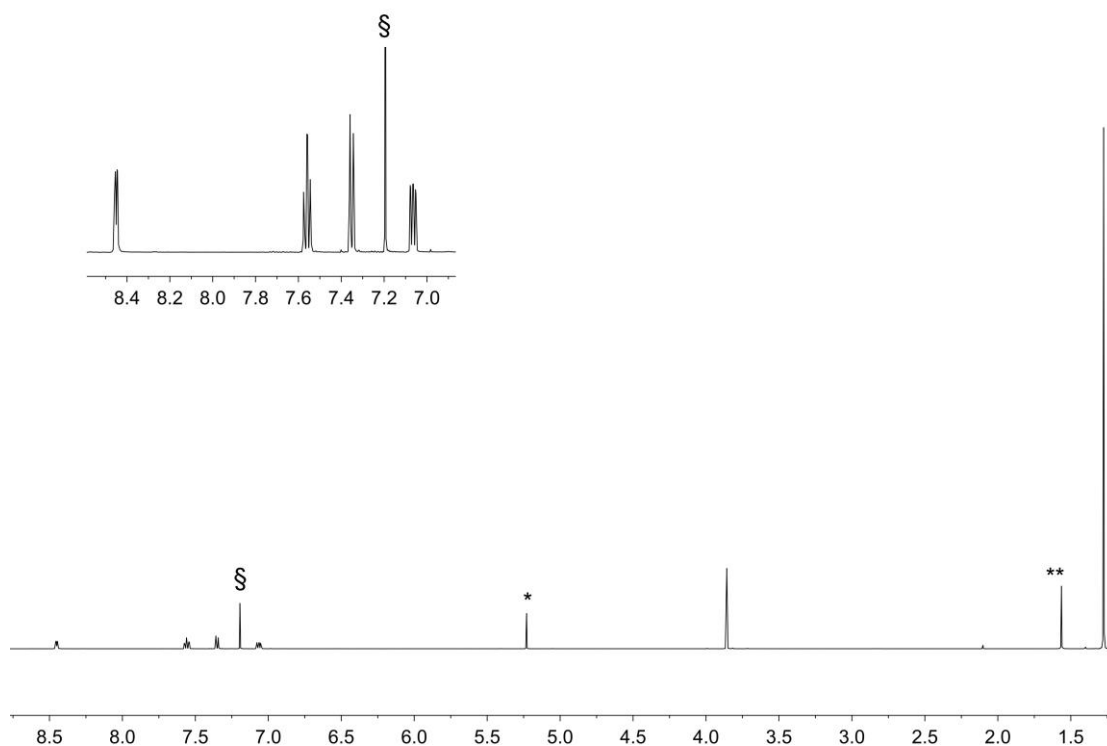

Figure S2. <sup>1</sup>H NMR spectrum of *t*BuSPy (500 MHz, CDCl<sub>3</sub>, 298 K). Inset: expansion of the aromatic region. § = residual CHCl<sub>3</sub>; \* = CH<sub>2</sub>Cl<sub>2</sub>; \*\* = H<sub>2</sub>O.

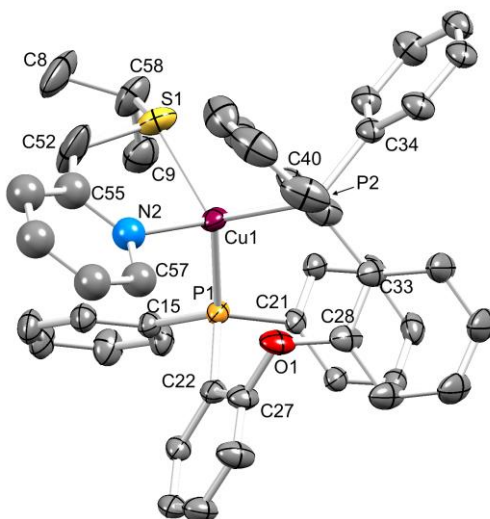

Figure S3. ORTEP-style plot of the [Cu(POP)(*i*PrSPy)]<sup>+</sup> cation in [Cu(POP)(*i*PrSPy)][PF<sub>6</sub>] with only one of each of the disordered sites (see manuscript) shown. Ellipsoids are plotted at 40% probability level and H atoms are omitted. The pyridine ring was refined isotropically. Selected bond parameters: Cu1–N2 = 2.114(5), Cu–S1 = 2.3229(12), Cu1–P1 = 2.2550(10), Cu1–P2 = 2.2722(11), C27–O1 = 1.393(4), C28–O1 = 1.385(5) Å; S1–Cu1–P1 = 123.57(5), S1–Cu1–P2 = 114.22(5), P1–Cu1–P2 = 111.84(4), C27–O1–C28 = 116.2(3)°.

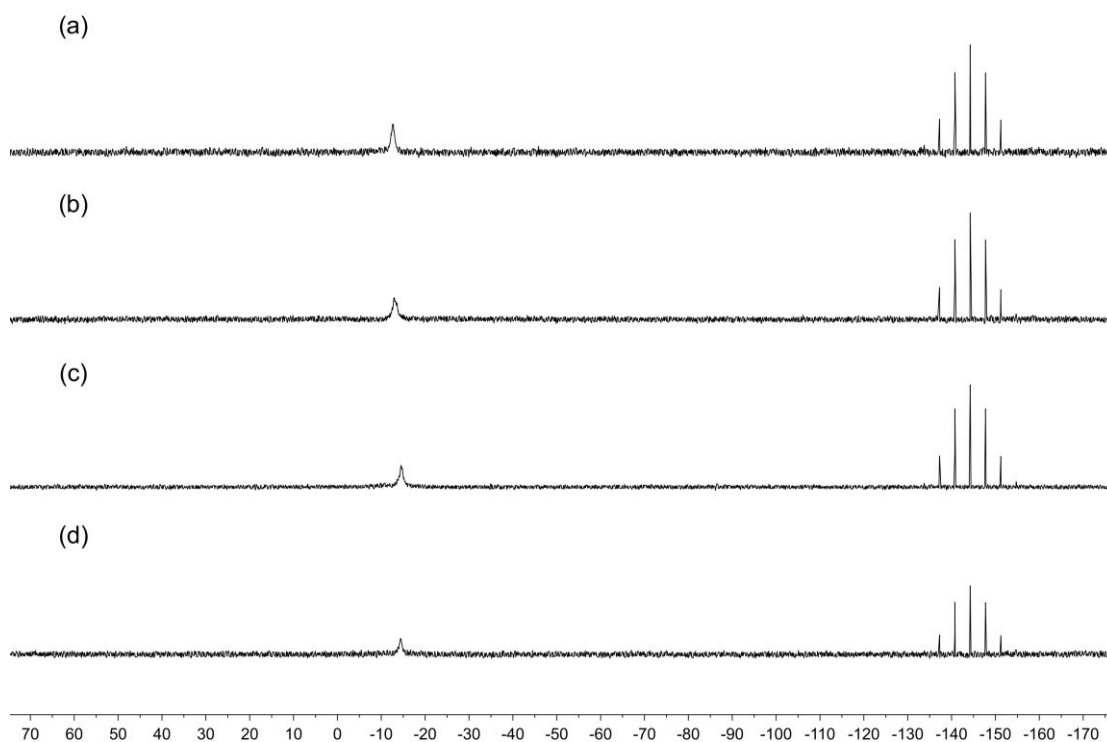

Figure S4.  $^{31}\text{P}\{^1\text{H}\}$  NMR spectra (202 MHz, acetone- $d_6$ , 298 K) of (a)  $[\text{Cu}(\text{POP})(i\text{PrSPy})][\text{PF}_6]$ , (b)  $[\text{Cu}(\text{POP})(t\text{BuSPy})][\text{PF}_6]$ , (c)  $[\text{Cu}(\text{xantphos})(i\text{PrSPy})][\text{PF}_6]$  and (d)  $[\text{Cu}(\text{xantphos})(t\text{BuSPy})][\text{PF}_6]$ .

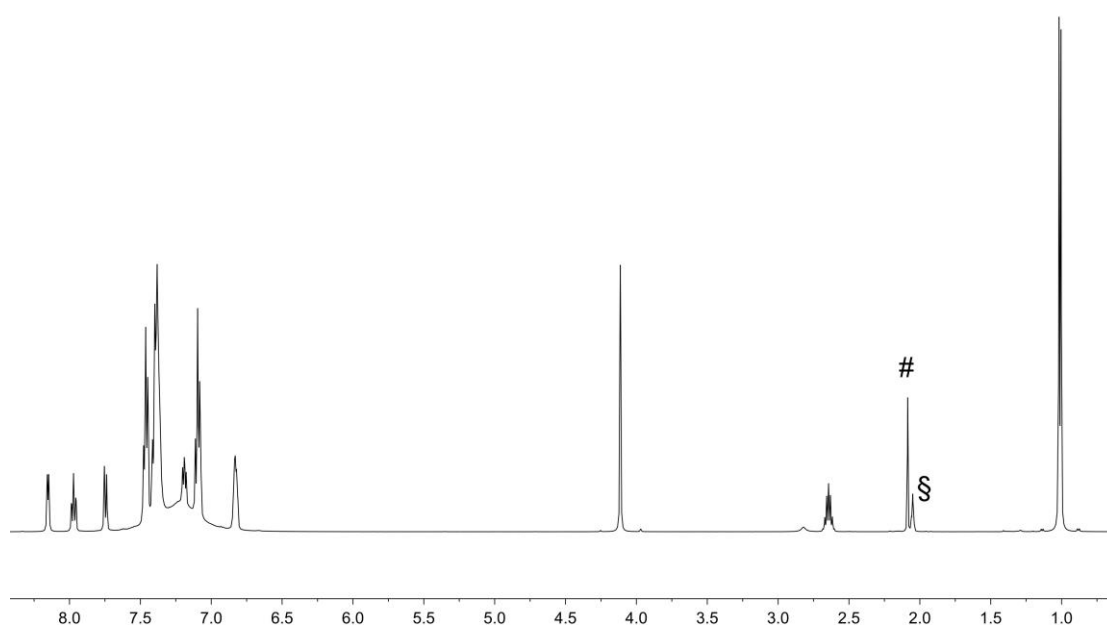

Figure S5.  $^1\text{H}$  NMR spectrum of  $[\text{Cu}(\text{POP})(i\text{PrSPy})][\text{PF}_6]$  (500 MHz, acetone- $d_6$ , 298 K). § = residual acetone- $d_5$ ; # =  $\text{Me}_2\text{CO}$

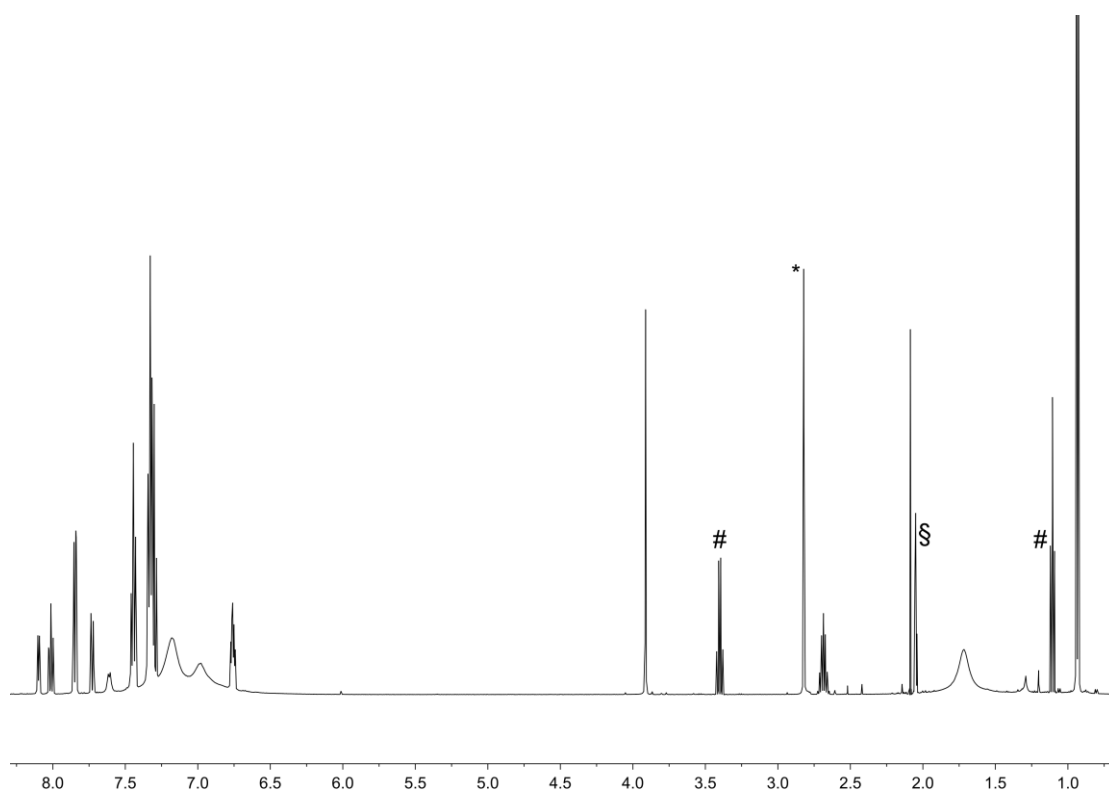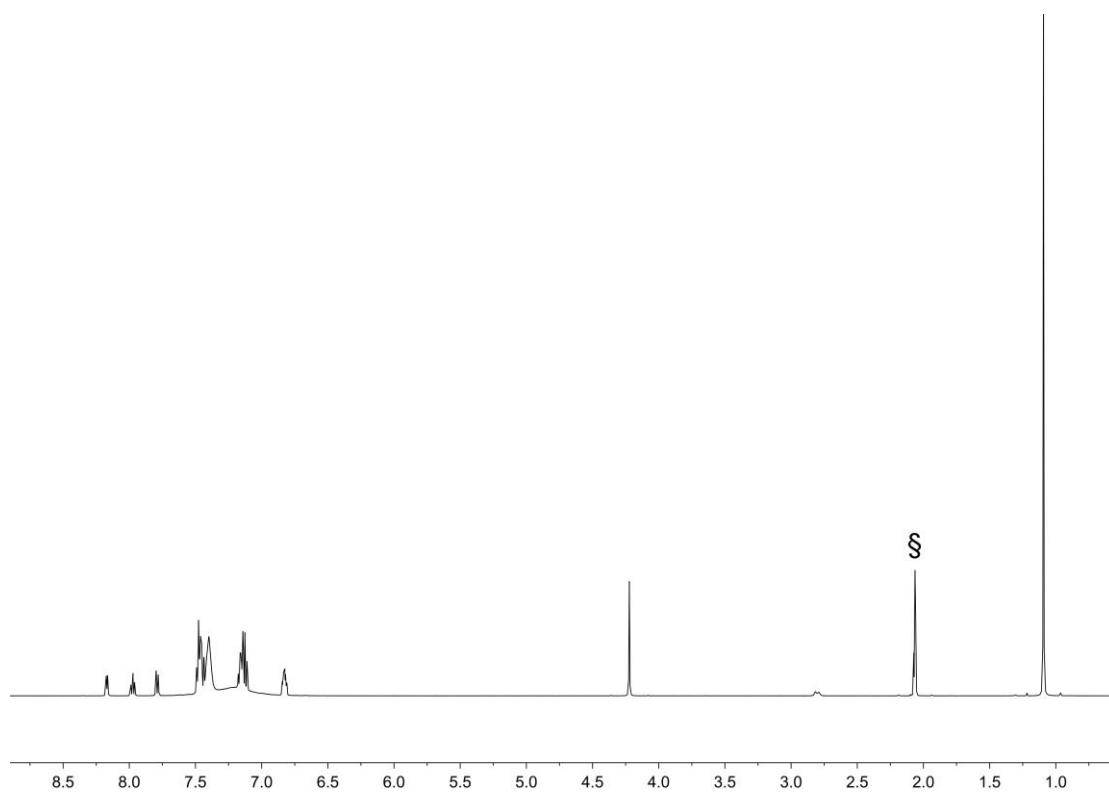

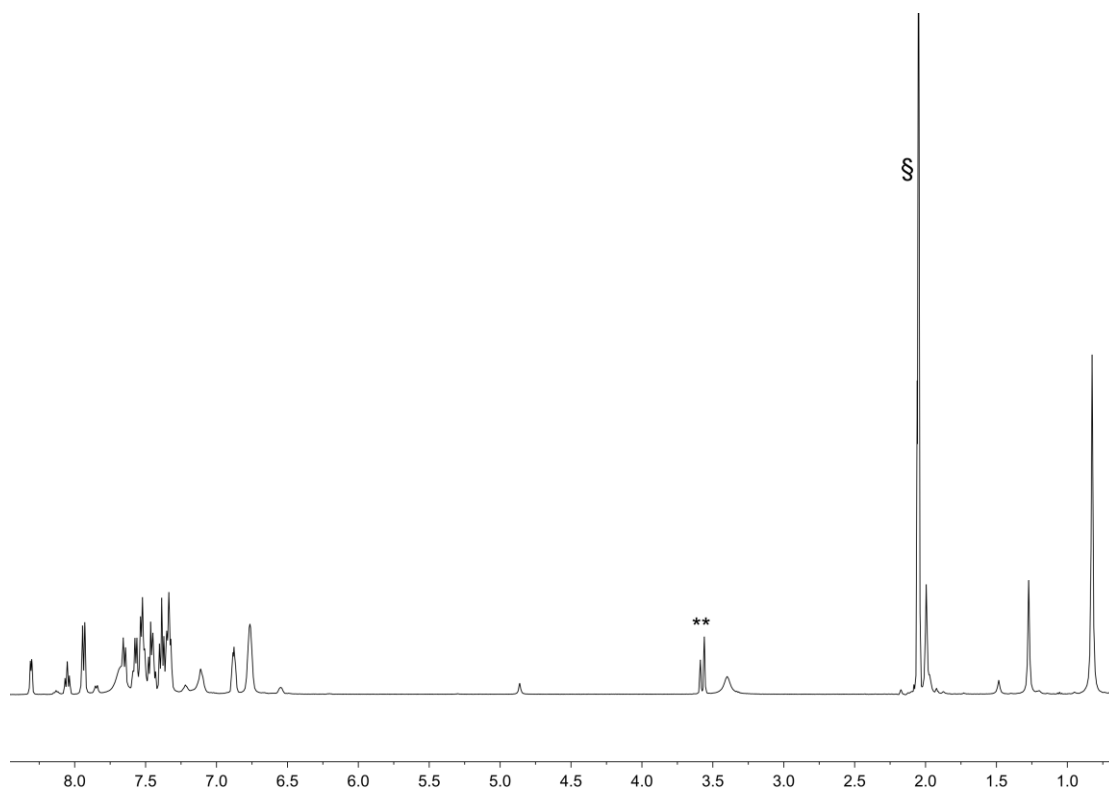

Figure S8.  $^1\text{H}$  NMR spectrum of  $[\text{Cu}(\text{xantphos})(t\text{BuSPy})][\text{PF}_6]$  (500 MHz, acetone- $d_6$ , 298 K).  $\S$  = residual acetone- $d_5$ ,  $**$  = unidentified impurities.

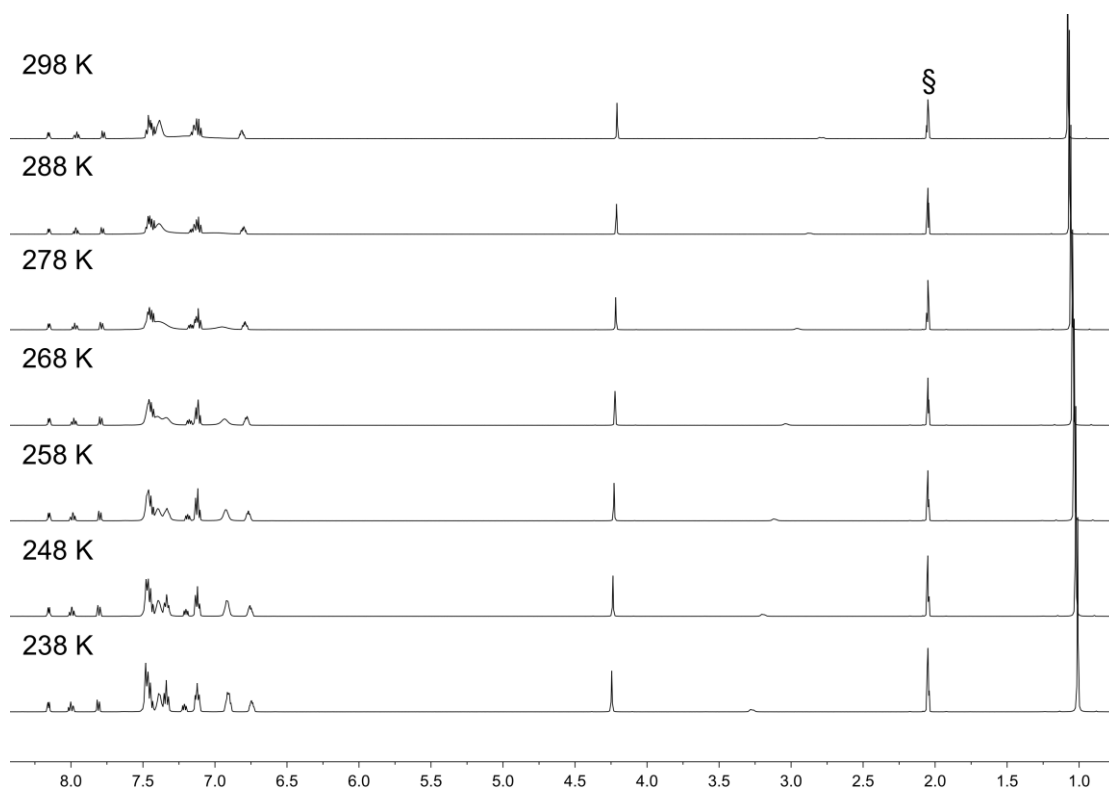

Figure S9. Variable temperature  $^1\text{H}$  NMR spectra of  $[\text{Cu}(\text{POP})(t\text{BuSPy})][\text{PF}_6]$  (500 MHz, acetone- $d_6$ ).  $\S$  = residual acetone- $d_5$ . The signals at  $\delta$  4.25 and 1.01 ppm arise from the  $\text{CH}_2$  and  $t\text{Bu}$  groups of the  $t\text{BuSPy}$  ligand.

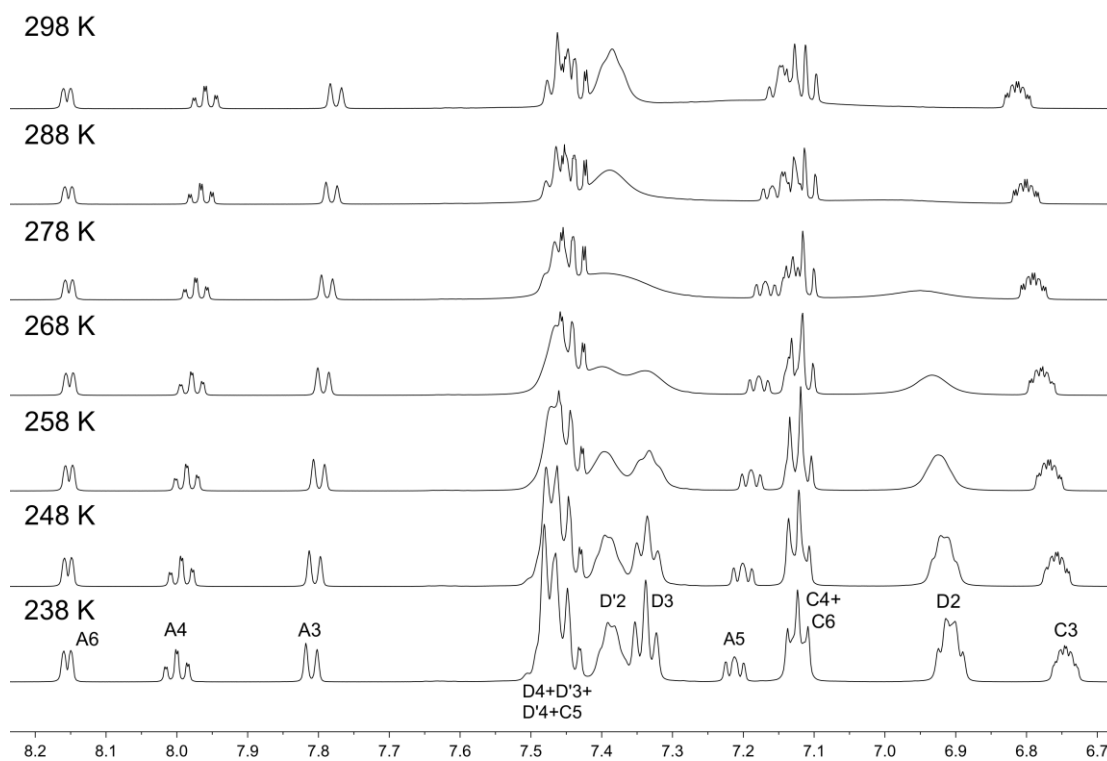

Figure S10. Aromatic region of the variable temperature  $^1\text{H}$  NMR spectra of  $[\text{Cu}(\text{POP})(t\text{BuSPy})][\text{PF}_6]$  (500 MHz, acetone- $d_6$ ). (An expansion of Fig. S9).

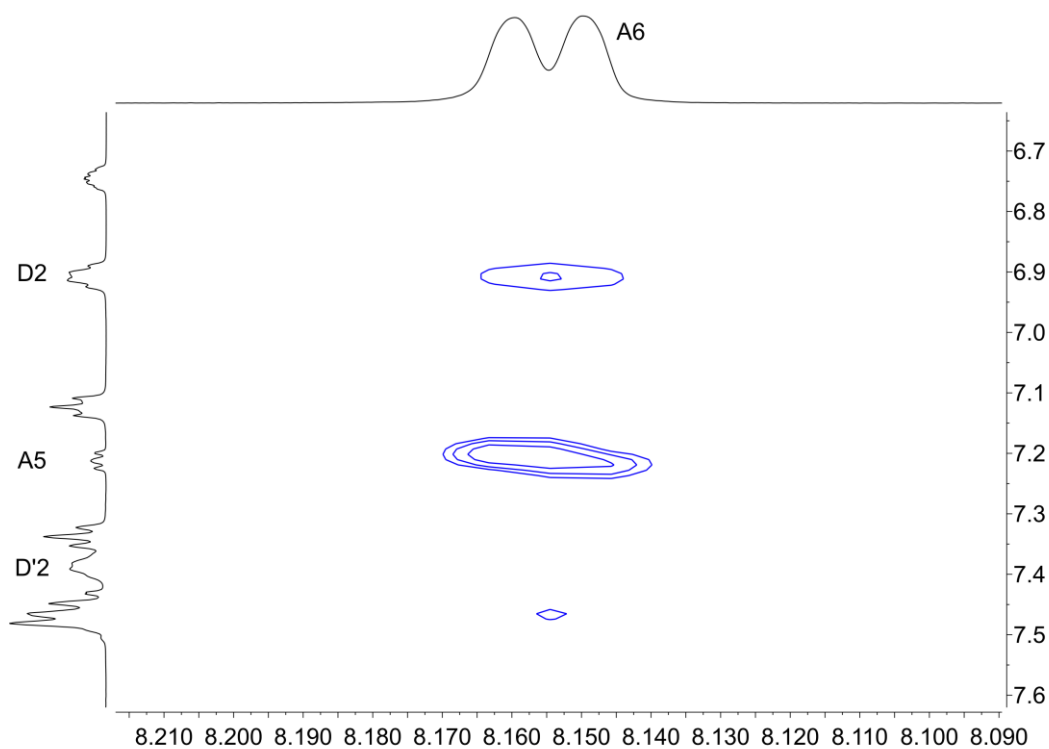

Figure S11.  $\text{H}^{\text{A6}}/\text{H}^{\text{D2}}$  NOESY cross-peak in the the ROESY spectrum of  $[\text{Cu}(\text{POP})(t\text{BuSPy})][\text{PF}_6]$  (500 MHz  $^1\text{H}$ , acetone- $d_6$ , 238 K). The figure also shows an  $\text{H}^{\text{A6}}/\text{H}^{\text{A5}}$  COSY cross-peak.

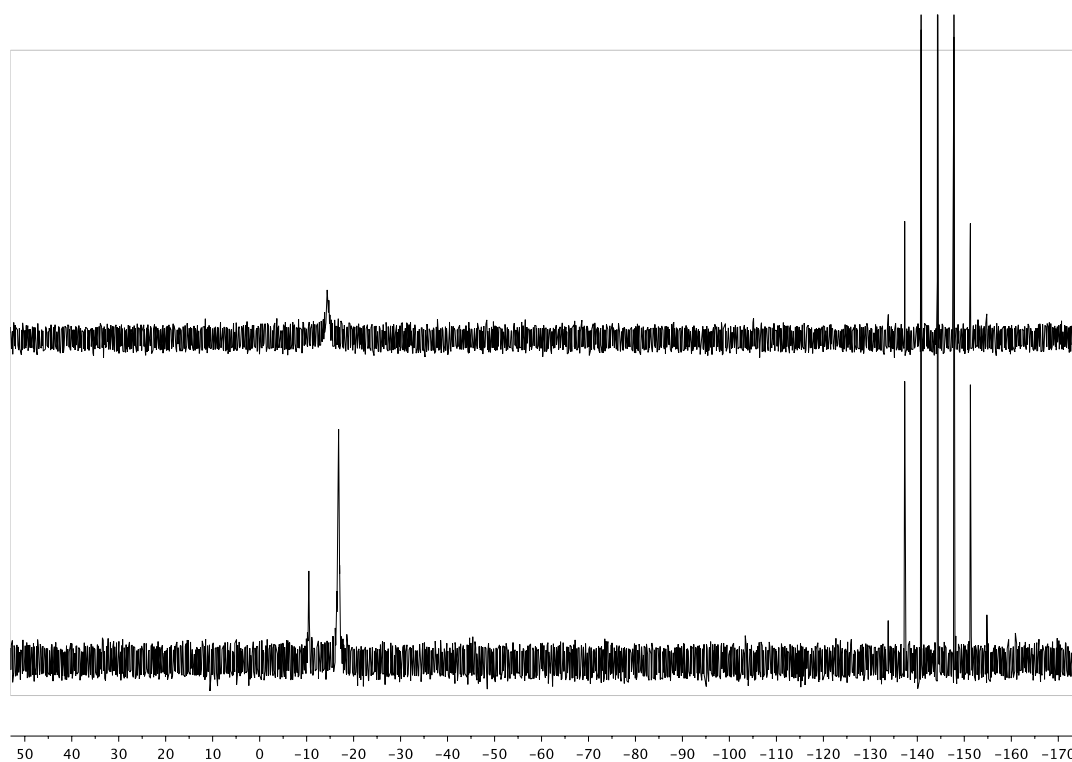

Figure S12.  $^{31}\text{P}\{^1\text{H}\}$  NMR spectra of  $[\text{Cu}(\text{xantphos})(t\text{BuSPy})][\text{PF}_6]$  (202 MHz,  $\text{acetone-}d_6$ ) at 298 K (top) and 198 K.

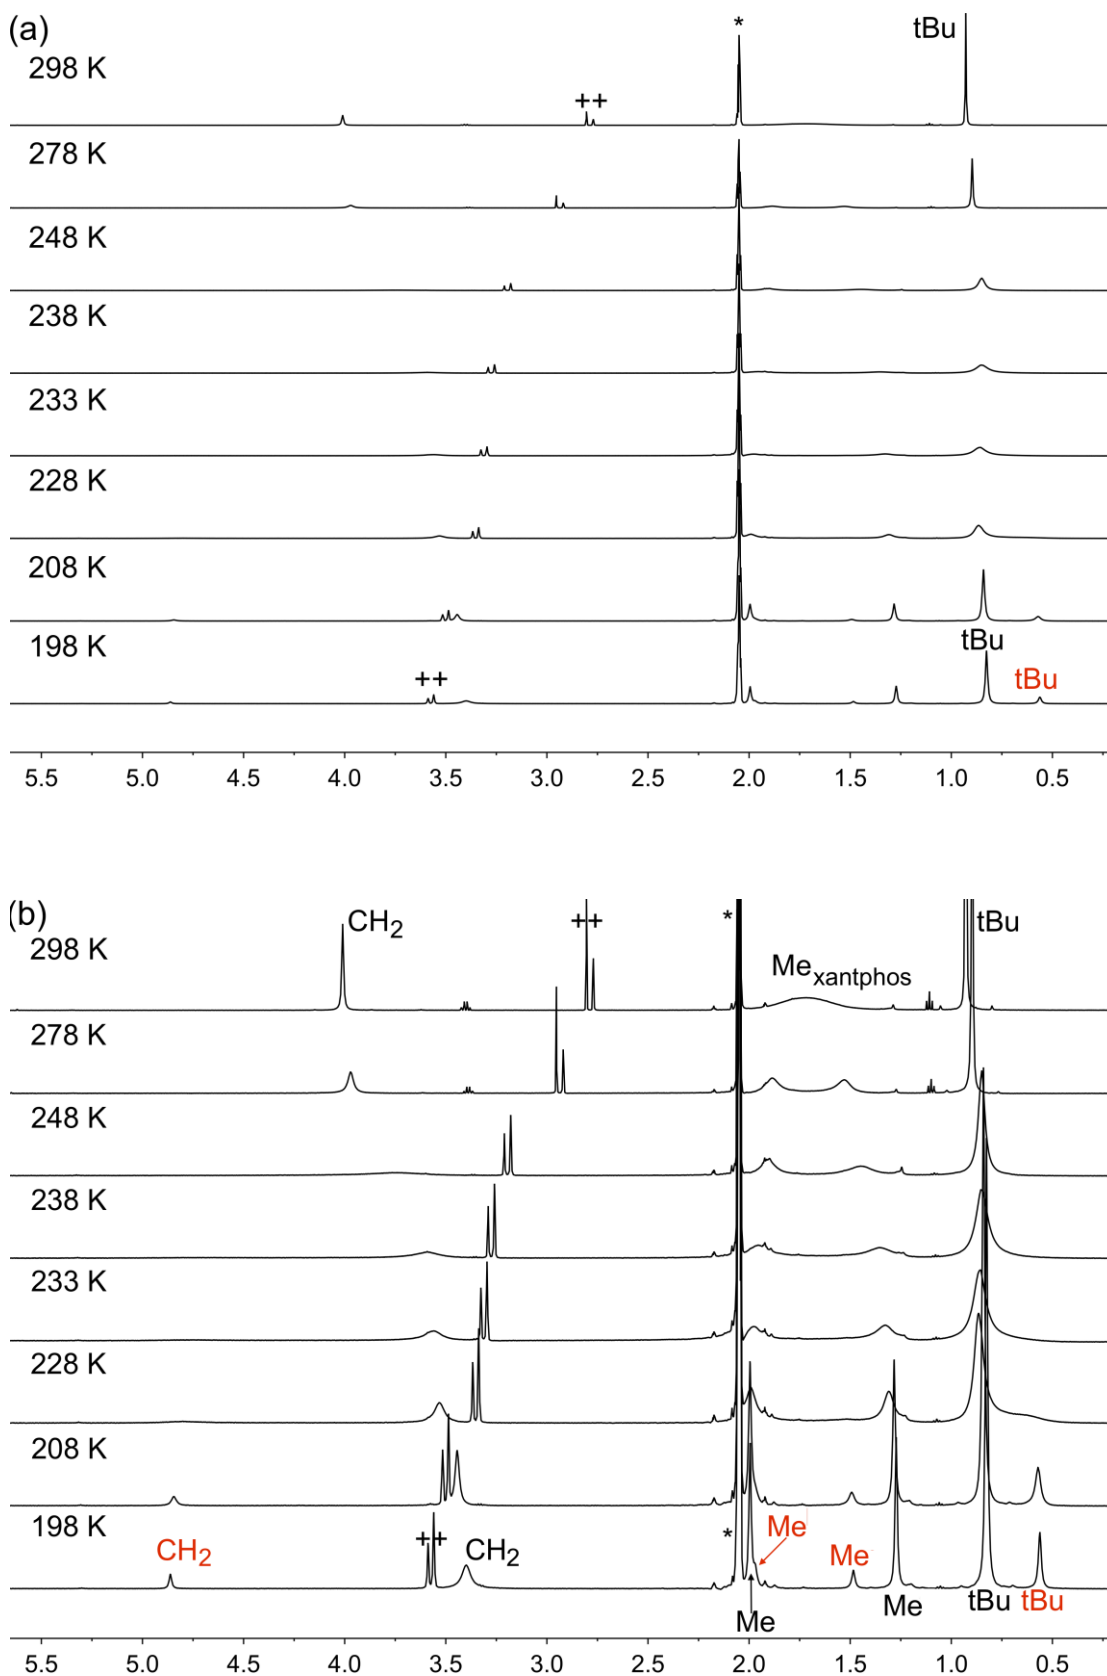

Figure S13. (a) Alkyl region in the variable temperature  $^1\text{H}$  NMR spectra of  $[\text{Cu}(\text{xantphos})(t\text{BuSPy})][\text{PF}_6]$  (500 MHz, acetone- $d_6$ ) and (b) a vertical expansion of the same set of spectra. Major species represented by black labels, minor by red labels. \* = residual acetone- $d_5$ . ++ = unidentified impurities.



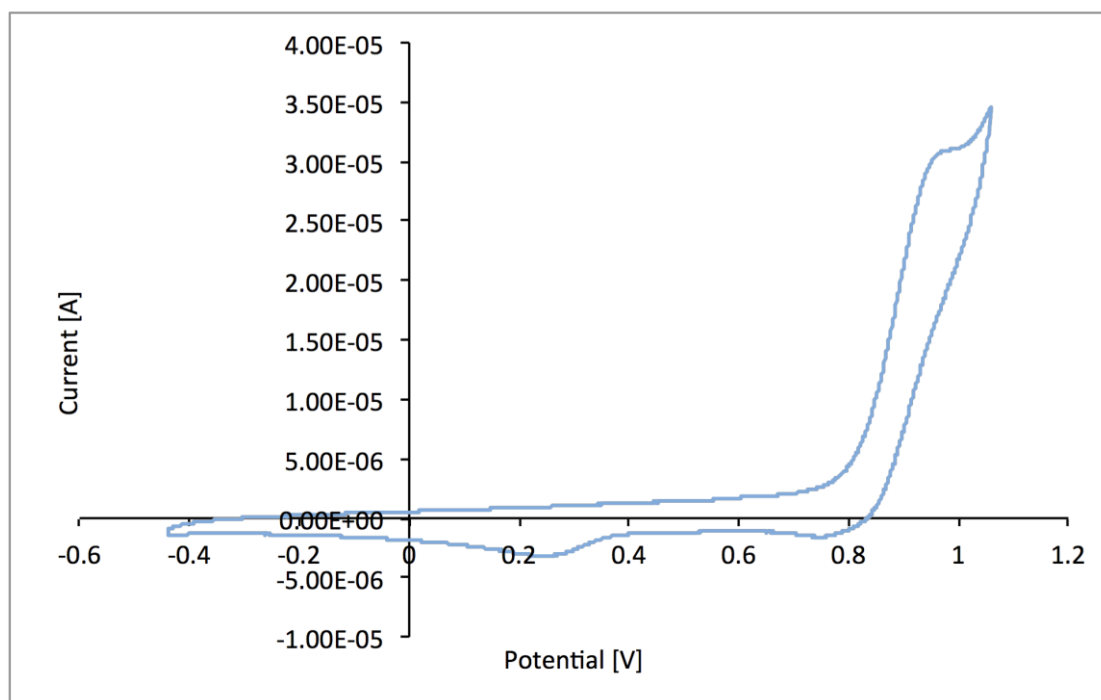

(a)

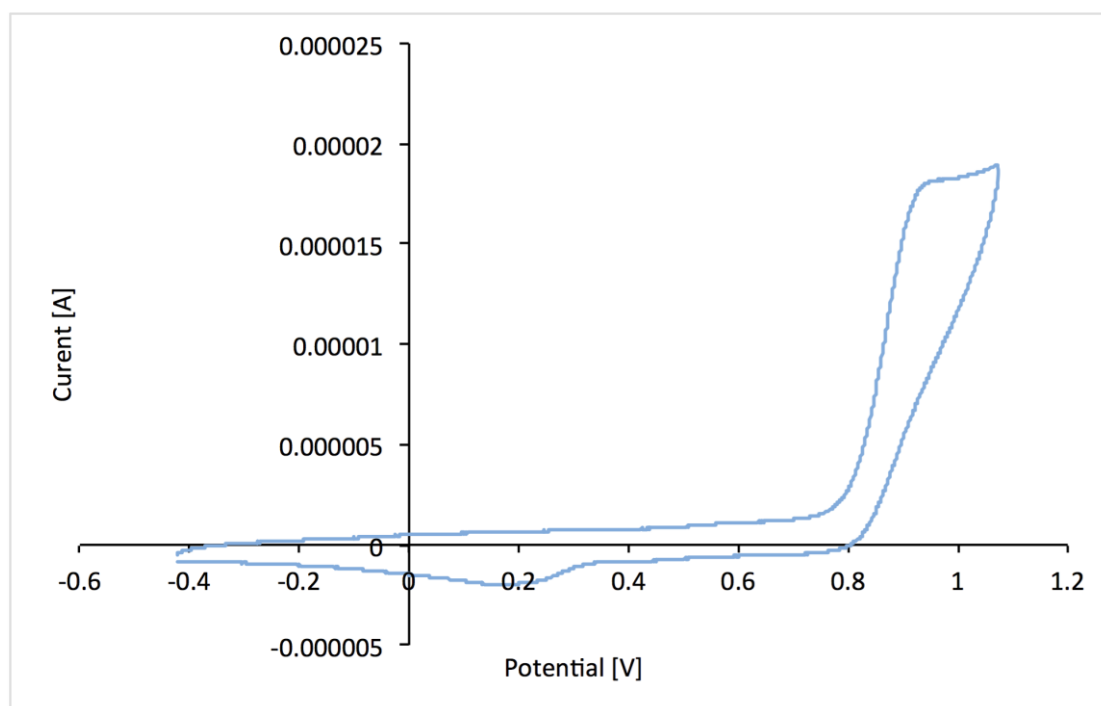

(b)

Figure S14. Cyclic voltammograms of (a) [Cu(POP)(iPrSPy)][PF<sub>6</sub>] and (b) [Cu(POP)(tBuSPy)][PF<sub>6</sub>] in CH<sub>2</sub>Cl<sub>2</sub> ( $1-5 \times 10^{-3}$  M, vs. Fc<sup>+</sup>/Fc, [nBu<sub>4</sub>N][PF<sub>6</sub>] as supporting electrolyte, scan rate = 0.1 V s<sup>-1</sup>).

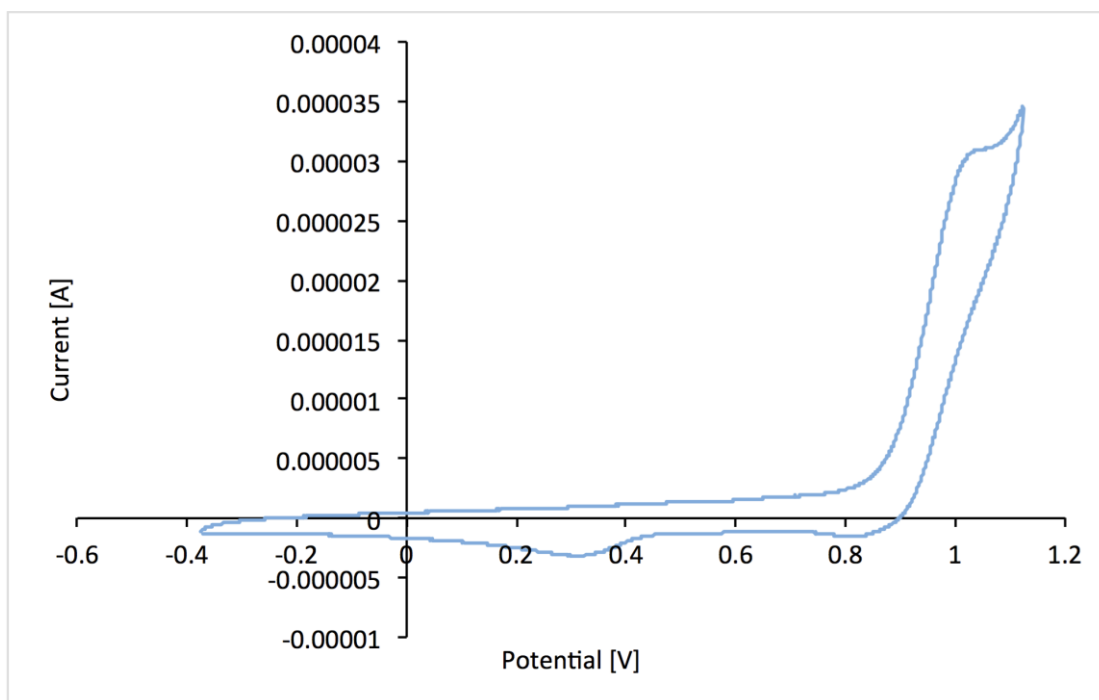

(a)

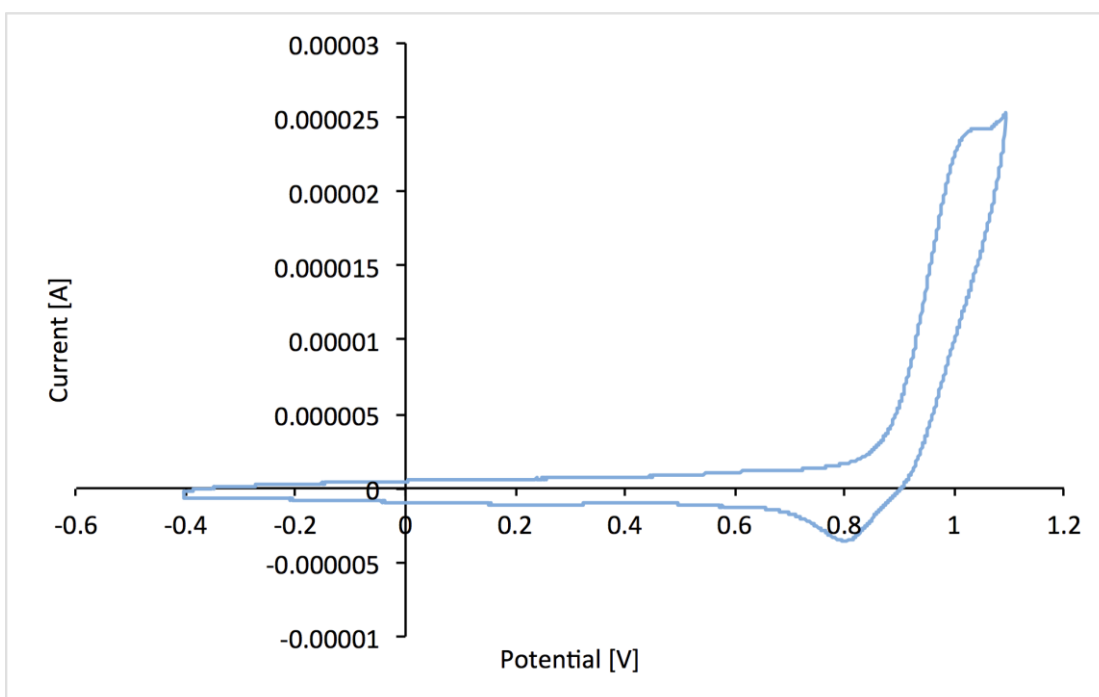

(b)

Figure S15. Cyclic voltammograms of (a) [Cu(xantphos)(iPrSPy)][PF<sub>6</sub>] and (b) [Cu(xantphos)(tBuSPy)][PF<sub>6</sub>] in CH<sub>2</sub>Cl<sub>2</sub> ( $1-5 \times 10^{-3}$  M, vs. Fc<sup>+</sup>/Fc, [nBu<sub>4</sub>N][PF<sub>6</sub>] as supporting electrolyte, scan rate = 0.1 V s<sup>-1</sup>).

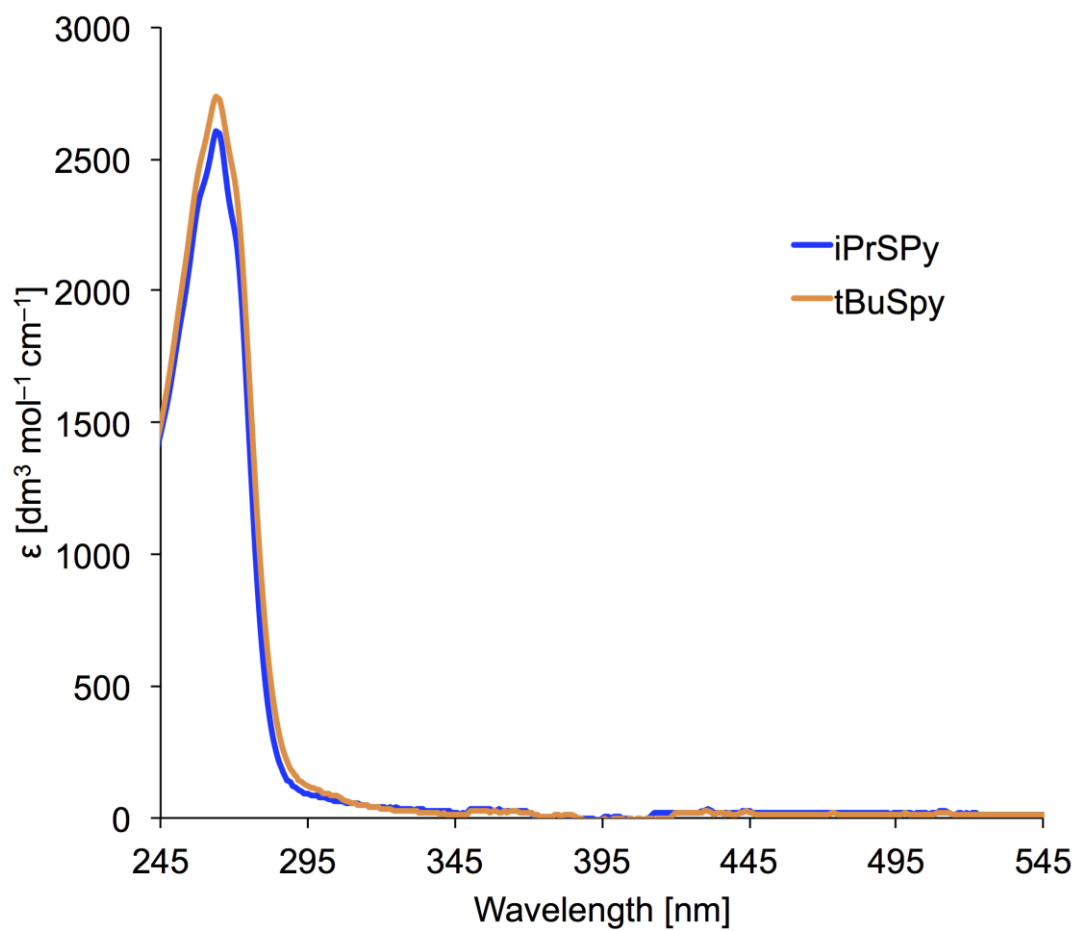

Figure S16. Absorption spectra of the ligands *i*PrSPy and *t*BuSPy ( $\text{CH}_2\text{Cl}_2$ ,  $1 \times 10^{-4} \text{ mol dm}^{-3}$ ).

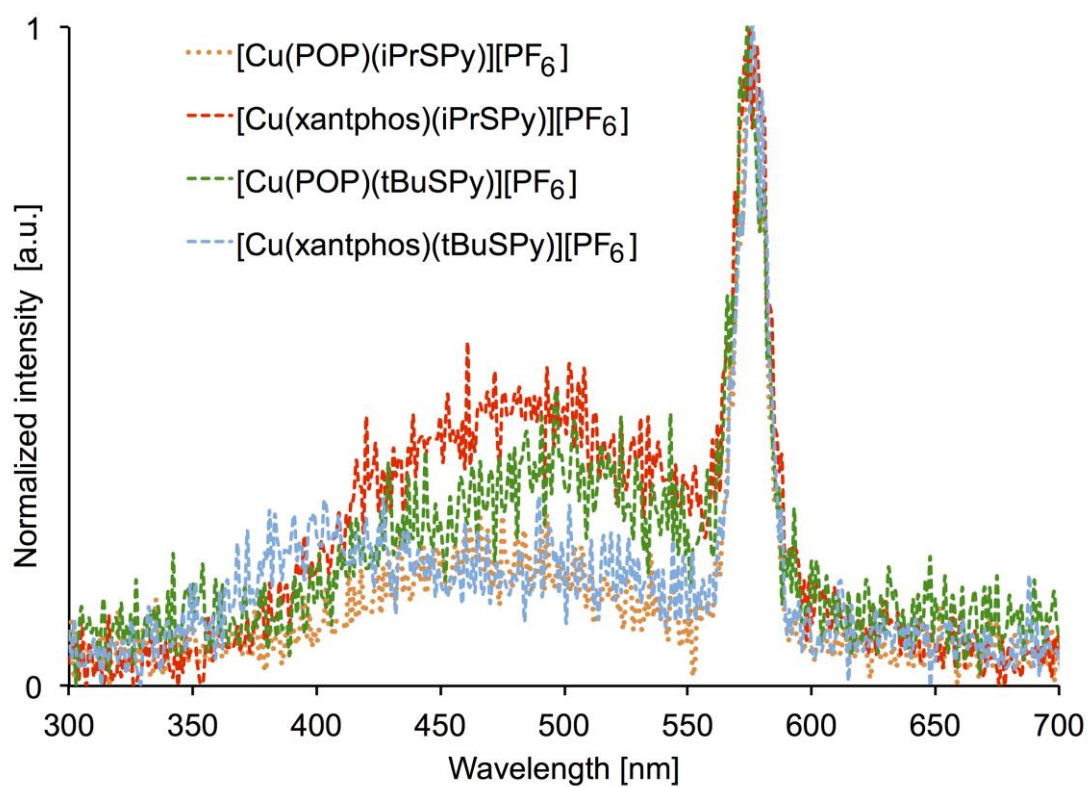

Figure S17. Solid-state emission spectra of the  $[\text{Cu}(\text{P}^{\wedge}\text{P})(\text{N}^{\wedge}\text{S})][\text{PF}_6]$  complexes, excited at 280 nm. The spectra are normalized to the harmonic of the excitation irradiation.
